# Supplementary material for: The High-Sensitivity C-Reactive Protein/Albumin Ratio Predicts Long-Term Oncologic Outcomes after Curative Resection for Hepatocellular Carcinoma
Source: J Clin Med. 2018 Jun 7;7(6):139. doi: 10.3390/jcm7060139 (PMC6024983; doi:10.3390/jcm7060139)
Supplement: Supplementary file 1 [file jcm-07-00139-s001.pdf]

# Supplemental Material: The High-Sensitivity C-Reactive Protein/Albumin Ratio Predicts Long-Term Oncologic Outcomes after Curative Resection for Hepatocellular Carcinoma

Table S1. Comparison for characteristics between laparoscopy and laparotomy.

| Variables                             | Laparoscopy<br>N = 232 | Laparotomy<br>N = 157 | P-value |
|---------------------------------------|------------------------|-----------------------|---------|
| Age (year)                            | 57.38 (11.52)          | 59.66 (11.93)         | 0.059   |
| Sex: Male                             | 165 (71.1%)            | 134 (85.4%)           | 0.001   |
| Body Mass Index (kg m <sup>-2</sup> ) | 24.18 (3.69)           | 23.36 (2.89)          | 0.020   |
| Charson Comorbidity Index             | 3.16 (1.17)            | 2.97 (1.15)           | 0.134   |
| Preoperative ASA class                |                        |                       | 0.355   |
| I                                     | 60 (25.9%)             | 43 (27.4%)            |         |
| II                                    | 157 (67.7%)            | 98 (62.4%)            |         |
| III, IV                               | 15 (6.4%)              | 16 (10.2%)            |         |
| Preoperative Child Pugh Class         |                        |                       | 0.016   |
| A                                     | 212 (91.4%)            | 129 (82.2%)           |         |
| B                                     | 16 (6.9%)              | 19 (12.1%)            |         |
| C                                     | 4 (1.7%)               | 9 (5.7%)              |         |
| Preoperative TACE                     | 54 (23.3%)             | 53 (33.8%)            | 0.033   |
| Preoperative RFA                      | 16 (6.9%)              | 10 (6.4%)             | 0.838   |
| Operation time (min)                  | 287.99 (174.70)        | 117.62 (9.39)         | 0.241   |
| Estimated Blood Loss (ml)             | 1043.10 (2068.37)      | 1112.99 (1457.11)     | 0.714   |
| Length of hospital stay (day)         | 9.84 (10.76)           | 16.22 (18.37)         | <0.001  |
| Tumor number                          | 1.21 (0.49)            | 1.32 (0.71)           | 0.054   |
| Intraoperative Pringle maneuver       | 31 (13.4%)             | 42 (26.8%)            | 0.004   |
| Resection margin: R0                  | 225 (97.0%)            | 143 (91.1%)           | 0.012   |
| Pathologic Tumor stage                |                        |                       | <0.001  |
| 1                                     | 127 (54.7%)            | 67 (42.7%)            |         |
| 2                                     | 89 (38.4%)             | 52 (33.1%)            |         |
| 3                                     | 9 (3.9%)               | 31 (19.75)            |         |
| 4,5                                   | 7 (3.1%)               | 7 (4.4%)              |         |
| Type of Resection: Major*             | 195 (84.1%)            | 76 (48.4%)            | <0.001  |
| Pathologic Tumor Size (cm)**          | 3.11 (1.74)            | 4.94 (2.85)           | <0.001  |
| Postoperative complication            | 38 (16.4%)             | 49 (31.2%)            | 0.001   |
| Postoperative hsCRP/ALB               | 0.87 (1.16)            | 1.06 (1.86)           | 0.208   |

Values are expressed as the mean (standard deviation) or number (percentage, %). Major resection\* includes resection of four or more liver segments; Tumor size (mm)\*\* means maximal diameter of largest Hepatocellular carcinoma. SD, Standard Deviation; ASA, American society of anesthesiologists; TACE, Transarterial chemoembolization; Radiofrequency ablation; hsCRP, high sensitivity C-reactive Protein; ALB, Albumin

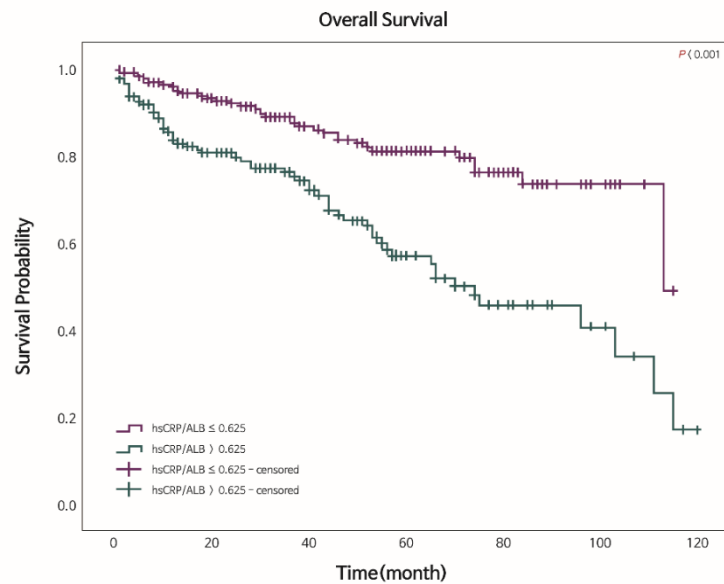

**Figure S1.** Receiver Operating Characteristics curve for mortality after resection of hepatocellular carcinoma. Area under curve from receiver operating characteristic analysis: 0.692; 95% confidence interval: 0.635–0.748.

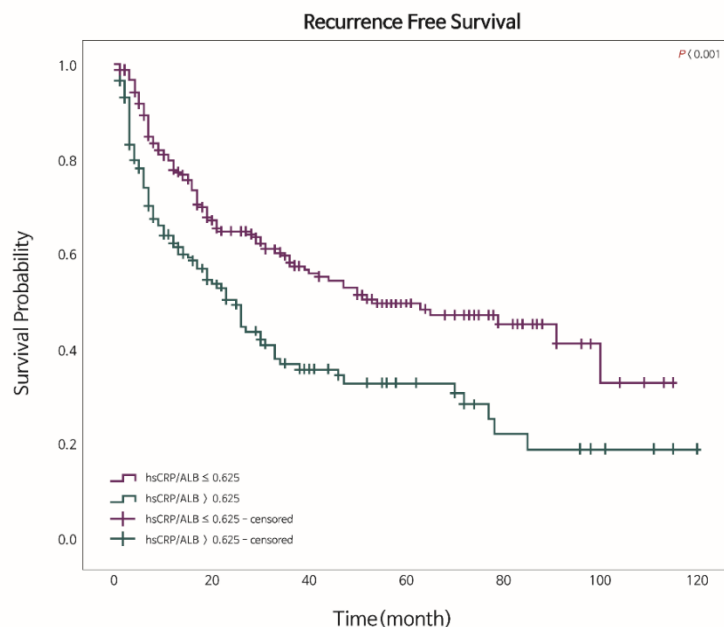

**Figure S2.** Receiver Operating Characteristics curve for recurrence after resection of hepatocellular carcinoma. Area under curve from receiver operating characteristic analysis: 0.587; 95% confidence interval: 0.536–0.637.
